# Supplementary material for: Trends in initiation of direct oral anticoagulant therapies for atrial fibrillation in a national population-based cross-sectional study in the French health insurance databases
Source: PubMed Central journal article supplement — BMJ Open. 2018 Mar 30;8(3):e018180. doi: 10.1136/bmjopen-2017-018180 (PMC5884337; doi:10.1136/bmjopen-2017-018180), 2018-03-30
Supplement: bmjopen-2017-018180supp001.pdf [file bmjopen-2017-018180supp001.pdf]

Supplementary table – Sources of codes used for the definition of covariates

| Covariates at cohort entry                                 | Definitions |                                                   |                               |                             |
|------------------------------------------------------------|-------------|---------------------------------------------------|-------------------------------|-----------------------------|
|                                                            | Drug claims | Hospital discharge diagnoses (main or associated) | Hospital Inpatient procedures | Long duration disease codes |
| High blood pressure                                        | X           | X                                                 |                               | X                           |
| Ischemic heart disease                                     |             | X                                                 |                               |                             |
| Heart failure                                              | X           | X                                                 |                               | X                           |
| Diabetes                                                   | X           | X                                                 |                               | X                           |
| Cancer                                                     | X           | X                                                 |                               | X                           |
| Renal failure                                              |             | X                                                 | X                             | X                           |
| Liver failure                                              |             | X                                                 |                               | X                           |
| Dementia                                                   | X           | X                                                 |                               | X                           |
| History Ischemic stroke                                    |             | X                                                 |                               | X                           |
| History of bleeding                                        | X           | X                                                 |                               |                             |
| HAS-BLED score                                             | X           | X                                                 | X                             | X                           |
| CHA <sub>2</sub> DS <sub>2</sub> - VASc <sub>2</sub> score | X           | X                                                 |                               | X                           |
| Aspirin                                                    | X           |                                                   |                               |                             |
| Nonsteroidal anti-inflammatory drugs                       | X           |                                                   |                               |                             |
| Antiplatelet Agents (other than Aspirin)                   | X           |                                                   |                               |                             |
| Corticosteroids                                            | X           |                                                   |                               |                             |
