# Supplementary material for: Trends in initiation of direct oral anticoagulant therapies for atrial fibrillation in a national population-based cross-sectional study in the French health insurance databases
Source: PubMed Central journal article supplement — BMJ Open. 2018 Mar 30;8(3):e018180. doi: 10.1136/bmjopen-2017-018180 (PMC5884337; doi:10.1136/bmjopen-2017-018180), 2018-03-30
Supplement: bmjopen-2017-018180supp002.pdf [file bmjopen-2017-018180supp002.pdf]

**Supplemental material – Sensitivity analysis – Cohort 1** - patients newly treated with an anticoagulant combined with an antiarrhythmic agent or a rate control treatment excluding beta-blockers, within a time window of +/- 30 days

**Table 1 – Characteristics of Patients and Prescribers at Anticoagulant Treatment Initiation (2011-2015)**

| *                                                                     | VKA*<br>N = 289,430 | DOACs†<br>N = 199,016 |
|-----------------------------------------------------------------------|---------------------|-----------------------|
| <b>Demographic characteristics</b>                                    |                     |                       |
| Mean age (sd§)                                                        | 76.1 (11.2)         | 73.7 (11.3)           |
| Male                                                                  | 49.8%               | 52.5%                 |
| <b>Clinical characteristics  </b>                                     |                     |                       |
| High blood pressure                                                   | 91.9%               | 88.7%                 |
| Ischemic heart disease                                                | 26.3%               | 16.6%                 |
| Heart failure                                                         | 34.4%               | 21.6%                 |
| Diabetes                                                              | 21.9%               | 18.6%                 |
| Cancer                                                                | 16.1%               | 13.0%                 |
| Renal failure                                                         | 9.7%                | 2.4%                  |
| Liver failure                                                         | 1.3%                | 0.7%                  |
| Dementia                                                              | 4.6%                | 2.7%                  |
| History Ischemic stroke                                               | 8.5%                | 6.2%                  |
| History of bleeding                                                   | 5.5%                | 2.9%                  |
| HAS-BLED score, mean (sd)                                             | 2.6 (0.9)           | 2.4 (0.9)             |
| CHA <sub>2</sub> DS <sub>2</sub> - VASc <sub>2</sub> score, mean (sd) | 3.9 (1.5)           | 3.4 (1.5)             |
| <b>Other treatment at cohort entry¶</b>                               |                     |                       |
| Aspirin                                                               | 45.9%               | 42.2%                 |
| Nonsteroidal anti-inflammatory drugs                                  | 13.8%               | 15.9%                 |
| Antiplatelet Agents (other than Aspirin)                              | 14.4%               | 10.9%                 |
| Corticosteroids                                                       | 13.9%               | 12.8%                 |
| <b>Prescriber of first anticoagulant</b>                              |                     |                       |
| General Practitioner                                                  | 59.7%               | 46.7%                 |
| <i>Among general practitioners</i>                                    | 65.0%               | 35.0%                 |
| Cardiologist                                                          | 27.7%               | 43.8%                 |
| <i>Among cardiologists</i>                                            | 47.9%               | 52.1%                 |
| Other specialist                                                      | 4.2%                | 3.8%                  |
| Unknown                                                               | 8.4%                | 5.6%                  |

Vitamin K agonist; † Direct oral anticoagulants; ‡, p value comparing VKA vs DOACs; § sd: standard deviation; || defined in the 12 months prior to cohort entry; ¶ defined in the 3 months prior to cohort entry

**Supplemental material – Sensitivity analysis – Cohort 1** - patients newly treated with an anticoagulant combined with an antiarrhythmic agent or a rate control treatment excluding beta-blockers, within a time window of +/- 30 days

**Table 2 – Characteristics of Patients and Prescribers at Anticoagulant Treatment Initiation in the Sub-Group of Patients Receiving a Direct Oral Anticoagulant (2011-2015)**

|                                                                  | <b>Dabigatran</b><br><b>N = 65,851</b> | <b>Rivaroxaban</b><br><b>N = 104,936</b> | <b>Apixaban</b><br><b>N = 28,229</b> |
|------------------------------------------------------------------|----------------------------------------|------------------------------------------|--------------------------------------|
| <b>Demographic characteristics</b>                               |                                        |                                          |                                      |
| Mean age (sd) <sup>†</sup>                                       | 73.7 (11.4)                            | 73.0 (11.3)                              | 76.0 (11.0)                          |
| Male                                                             | 52.3%                                  | 53.4%                                    | 49.6%                                |
| <b>Clinical characteristics<sup>‡</sup></b>                      |                                        |                                          |                                      |
| High blood pressure                                              | 88.7%                                  | 87.8%                                    | 91.8%                                |
| Ischemic heart disease                                           | 17.9%                                  | 15.8%                                    | 17.0%                                |
| Heart failure                                                    | 22.8%                                  | 19.9%                                    | 25.2%                                |
| Diabetes                                                         | 18.6%                                  | 18.3%                                    | 20.0%                                |
| Cancer                                                           | 14.0%                                  | 12.8%                                    | 11.3%                                |
| Renal failure                                                    | 2.1%                                   | 2.2%                                     | 3.8%                                 |
| Liver failure                                                    | 0.7%                                   | 0.6%                                     | 0.6%                                 |
| Dementia                                                         | 2.8%                                   | 2.6%                                     | 2.9%                                 |
| History of ischemic stroke                                       | 7.2%                                   | 5.4%                                     | 7.1%                                 |
| History of bleeding                                              | 2.7%                                   | 2.7%                                     | 3.6%                                 |
| HAS-BLED score, mean (sd)                                        | 2.4 (0.9)                              | 2.3 (0.9)                                | 2.5 (0.9)                            |
| CHA <sub>2</sub> DS <sub>2</sub> - VASc <sub>2</sub> , mean (sd) | 3.4 (1.5)                              | 3.2 (1.5)                                | 3.6 (1.4)                            |
| <b>Other treatments at cohort entry<sup>§</sup></b>              |                                        |                                          |                                      |
| Aspirin                                                          | 43.0%                                  | 41.4%                                    | 43.2%                                |
| Nonsteroidal anti-inflammatory drugs                             | 16.6%                                  | 16.1%                                    | 13.2%                                |
| Antiplatelet Agents (other than Aspirin)                         | 11.3%                                  | 10.4%                                    | 12.1%                                |
| Corticosteroids                                                  | 12.8%                                  | 12.8%                                    | 12.6%                                |
| <b>Prescriber of first anticoagulant</b>                         |                                        |                                          |                                      |
| General Practitioner                                             | 47.0%                                  | 46.3%                                    | 47.5%                                |
| Cardiologist                                                     | 43.1%                                  | 44.9%                                    | 41.7%                                |
| Other specialist                                                 | 3.7%                                   | 3.8%                                     | 4.1%                                 |
| Unknown                                                          | 6.2%                                   | 5.0%                                     | 6.7%                                 |

\* Direct oral anticoagulants, † Standard deviation, ‡ defined in the 12 months prior to cohort entry, § defined in the 3 months prior to cohort entry

**Supplemental material – Sensitivity analysis – Cohort 1** - patients newly treated with an anticoagulant combined with an antiarrhythmic agent or a rate control treatment excluding beta-blockers, within a time window of +/- 30 days

**Table 3 – Multivariate analysis of the determinants associated with DOAC initiation according to year of therapy initiation**

| Characteristics at treatment initiation             | 2011<br>N = 101,817 |             | 2012<br>N = 110,571 |               | 2013<br>N = 103,594 |             | 2014<br>N = 94,180 |             | 2015<br>N = 78,284 |             |
|-----------------------------------------------------|---------------------|-------------|---------------------|---------------|---------------------|-------------|--------------------|-------------|--------------------|-------------|
|                                                     | Adjusted OR         | CI 95%*     | Adjusted OR         | CI 95%        | Adjusted OR         | CI 95%      | Adjusted OR        | CI 95%      | Adjusted OR        | CI 95%      |
| <b>Demographic characteristics</b>                  |                     |             |                     |               |                     |             |                    |             |                    |             |
| Age                                                 |                     |             |                     |               |                     |             |                    |             |                    |             |
| < 65 years                                          | 0.89                | 0.78 – 1.01 | 0.93                | 0.88 – 0.97   | 1.02                | 0.98 – 1.06 | 1.15               | 1.10 – 1.21 | 1.08               | 1.03 – 1.14 |
| 65 –74 years                                        | 1.0                 |             | 1.0                 |               | 1.0                 |             | 1.0                |             | 1.0                |             |
| >= 75 years                                         | 1.15                | 1.04 – 1.27 | 0.98                | 0.94 – 1.01   | 0.69                | 0.67 – 0.71 | 0.59               | 0.57 – 0.61 | 0.65               | 0.63 – 0.68 |
| Sex (Male)                                          | 0.86                | 0.79 – 0.94 | 0.97                | 0.94 – 1.01   | 1.09                | 1.06 – 1.13 | 1.10               | 1.06 – 1.13 | 1.08               | 1.05 – 1.12 |
| <b>Clinical characteristics<sup>†</sup></b>         |                     |             |                     |               |                     |             |                    |             |                    |             |
| High blood pressure                                 | 0.87                | 0.76 – 1.00 | 0.82                | 0.78 – 0.86   | 0.79                | 0.75 – 0.83 | 0.78               | 0.74 – 0.82 | 0.79               | 0.74 – 0.84 |
| Ischemic heart disease                              | 0.88                | 0.79 – 0.97 | 0.83                | 0.80 – 0.86   | 0.76                | 0.74 – 0.79 | 0.74               | 0.72 – 0.77 | 0.76               | 0.72 – 0.79 |
| Heart failure                                       | 0.60                | 0.55 – 0.67 | 0.70                | 0.68 – 0.72   | 0.61                | 0.59 – 0.63 | 0.59               | 0.57 – 0.61 | 0.63               | 0.60 – 0.65 |
| Diabetes                                            | 0.88                | 0.79 – 0.98 | 0.89                | 0.86 – 0.93   | 0.88                | 0.85 – 0.91 | 0.93               | 0.89 – 0.96 | 0.92               | 0.89 – 0.96 |
| Cancer                                              | 0.98                | 0.88 – 1.10 | 0.96                | 0.92 – 1.00   | 0.85                | 0.81 – 0.88 | 0.85               | 0.81 – 0.88 | 0.84               | 0.80 – 0.89 |
| Renal failure                                       | 0.50                | 0.39 – 0.63 | 0.34                | 0.31 – 0.36   | 0.23                | 0.22 – 0.25 | 0.22               | 0.20 – 0.23 | 0.24               | 0.23 – 0.26 |
| Liver failure                                       | 0.59                | 0.33 – 1.05 | 0.74                | 0.63 – 0.88   | 0.59                | 0.52 – 0.68 | 0.58               | 0.50 – 0.66 | 0.49               | 0.41 – 0.58 |
| Dementia                                            | 0.96                | 0.77 – 1.19 | 0.84                | 0.77 – 0.92   | 0.75                | 0.70 – 0.80 | 0.81               | 0.76 – 0.88 | 0.74               | 0.68 – 0.81 |
| History of Ischemic Stroke                          | 1.01                | 0.87 – 1.16 | 0.99                | 0.94 – 1.05   | 0.88                | 0.84 – 0.93 | 0.88               | 0.84 – 0.93 | 0.92               | 0.86 – 0.98 |
| History of bleeding                                 | 1.28                | 1.06 – 1.55 | 0.70                | 0.64 – 0.76   | 0.52                | 0.48 – 0.55 | 0.52               | 0.49 – 0.56 | 0.57               | 0.53 – 0.61 |
| <b>Prescriber of first anticoagulant</b>            |                     |             |                     |               |                     |             |                    |             |                    |             |
| General Practitioner                                | 1.0                 |             | 1.0                 |               | 1.0                 |             | 1.0                |             | 1.0                |             |
| Cardiologist                                        | 1.30                | 1.19 – 1.42 | 2.33                | 2.25 – 2.41   | 2.63                | 2.55 – 2.71 | 2.57               | 2.49 – 2.65 | 2.46               | 2.37 – 0.56 |
| Other specialists/Unknown                           | 1.72                | 1.52 – 1.93 | 1.03                | 0.97 – 1.08   | 1.00                | 0.96 – 1.05 | 1.03               | 0.98 – 1.07 | 1.03               | 0.98 – 1.08 |
| <b>Other treatments at cohort entry<sup>‡</sup></b> |                     |             |                     |               |                     |             |                    |             |                    |             |
| Aspirin                                             | 1.28                | 1.18 – 1.42 | 1.16                | 1.12 – 1.19   | 0.98                | 0.85 – 1.00 | 0.93               | 0.90 – 0.95 | 0.87               | 0.84 – 0.90 |
| NSAID                                               | 1.37                | 1.24 – 1.52 | 1.16                | 1.11 – 1.21   | 1.18                | 1.13 – 1.22 | 1.21               | 1.17 – 1.27 | 1.20               | 1.14 – 1.26 |
| Antiplatelet Agents                                 | 1.30                | 1.15 – 1.46 | 1.06                | 1.01 – 1.11   | 0.85                | 0.82 – 0.89 | 0.73               | 0.70 – 0.76 | 0.78               | 0.74 – 0.82 |
| Corticosteroids                                     | 0.90                | 0.79 – 1.02 | 0.96                | 0.92 – 1.00   | 0.93                | 0.89 – 0.96 | 0.98               | 0.94 – 1.02 | 0.92               | 0.88 – 0.96 |
| <b>Time of anticoagulant initiation</b>             |                     |             |                     |               |                     |             |                    |             |                    |             |
| 1 <sup>st</sup> term of the year                    | 1.0                 |             | 1.0                 |               | 1.0                 |             | 1.0                |             | 1.0                |             |
| 2 <sup>nd</sup> term of the year                    | 1.13                | 0.96 – 1.32 | 3.17                | 2.98 – 3.37   | 1.00                | 0.96 – 1.04 | 1.08               | 1.04 – 1.13 | 1.11               | 1.06 – 1.15 |
| 3 <sup>rd</sup> term of the year                    | 2.05                | 1.77 – 2.37 | 9.37                | 8.84 – 9.94   | 0.93                | 0.89 – 0.96 | 1.09               | 1.05 – 1.14 | 1.17               | 1.11 – 1.22 |
| 4 <sup>th</sup> term of the year                    | 4.71                | 4.14 – 5.36 | 31.06               | 29.34 – 32.88 | 0.54                | 0.52 – 0.56 | 1.35               | 1.30 – 1.40 | 1.39               | 1.33 – 1.45 |

\* 95% Confidence interval; † defined in the 12 months prior to cohort entry; ‡ defined in the 3 months prior to cohort entry
