# Supplementary material for: Trends in initiation of direct oral anticoagulant therapies for atrial fibrillation in a national population-based cross-sectional study in the French health insurance databases
Source: PubMed Central journal article supplement — BMJ Open. 2018 Mar 30;8(3):e018180. doi: 10.1136/bmjopen-2017-018180 (PMC5884337; doi:10.1136/bmjopen-2017-018180), 2018-03-30
Supplement: bmjopen-2017-018180supp003.pdf [file bmjopen-2017-018180supp003.pdf]

**Supplemental material – Sensitivity analysis – Cohort 2** - Cohort all patients newly treated with an anticoagulant therapy regardless of other potential concomitant therapies

**Table 1 – Characteristics of Patients and Prescribers at Anticoagulant Treatment Initiation (2011-2015).**

|                                                                       | VKA*        | DOACs <sup>†</sup> |
|-----------------------------------------------------------------------|-------------|--------------------|
|                                                                       | N = 952,565 | N = 661,089        |
| <b>Demographic characteristics</b>                                    |             |                    |
| Mean age (sd <sup>§</sup> )                                           | 71.7 (15.3) | 69.5 (13.8)        |
| Male                                                                  | 48.4%       | 49.2%              |
| <b>Clinical characteristics<sup>  </sup></b>                          |             |                    |
| High blood pressure                                                   | 78.5%       | 71.3%              |
| Ischemic heart disease                                                | 21.0%       | 11.9%              |
| Heart failure                                                         | 18.6%       | 8.8%               |
| Diabetes                                                              | 19.9%       | 15.7%              |
| Cancer                                                                | 16.7%       | 11.6%              |
| Renal failure                                                         | 9.3%        | 1.9%               |
| Liver failure                                                         | 1.6%        | 0.6%               |
| Dementia                                                              | 5.5%        | 2.4%               |
| History Ischemic stroke                                               | 8.6%        | 5.0%               |
| History of bleeding                                                   | 6.8%        | 3.6%               |
| HAS-BLED score, mean (sd)                                             | 2.3 (1.1)   | 2.0 (1.1)          |
| CHA <sub>2</sub> DS <sub>2</sub> - VASc <sub>2</sub> score, mean (sd) | 3.3 (1.7)   | 2.8 (1.6)          |
| <b>Other treatment at cohort entry<sup>¶</sup></b>                    |             |                    |
| Aspirin                                                               | 35.8%       | 28.9%              |
| Nonsteroidal anti-inflammatory drugs                                  | 17.1%       | 28.4%              |
| Antiplatelet Agents (other than Aspirin)                              | 11.7%       | 7.4%               |
| Corticosteroids                                                       | 15.1%       | 12.7%              |
| <b>Prescriber of first anticoagulant</b>                              |             |                    |
| General Practitioner                                                  | 70.7%       | 54.1%              |
| <i>Among General Practitioners</i>                                    | 64.7%       | 35.3%              |
| Cardiologist                                                          | 15.6%       | 21.7%              |
| <i>Among Cardiologists</i>                                            | 50.0%       | 50.0%              |
| Other specialist                                                      | 5.8%        | 18.2%              |
| Unknown                                                               | 7.9%        | 6.0%               |

\* Vitamin K agonist; † Direct oral anticoagulants; ‡, p value comparing VKA vs DOACs; § sd: standard deviation; || defined in the 12 months prior to cohort entry; ¶ defined in the 3 months prior to cohort entry

**Supplemental material – Sensitivity analysis – Cohort 2** - Cohort all patients newly treated with an anticoagulant therapy regardless of other potential concomitant therapies

**Table 2 – Characteristics of Patients and Prescribers at Anticoagulant Treatment Initiation in the Sub-Group of Patients Receiving a Direct Oral Anticoagulant (2011-2015) AC**

|                                                                  | <b>Dabigatran</b><br><b>N = 174,423</b> | <b>Rivaroxaban</b><br><b>N = 419,780</b> | <b>Apixaban</b><br><b>N = 66,886</b> |
|------------------------------------------------------------------|-----------------------------------------|------------------------------------------|--------------------------------------|
| <b>Demographic characteristics</b>                               |                                         |                                          |                                      |
| Mean age (sd <sup>†</sup> )                                      | 71.5 (12.5)                             | 67.8 (14.3)                              | 74.5 (11.8)                          |
| Male                                                             | 49.6%                                   | 49.0%                                    | 49.4%                                |
| <b>Clinical characteristics<sup>‡</sup></b>                      |                                         |                                          |                                      |
| High blood pressure                                              | 76.9%                                   | 66.9%                                    | 84.4%                                |
| Ischemic heart disease                                           | 14.8%                                   | 10.4%                                    | 14.0%                                |
| Heart failure                                                    | 11.0%                                   | 6.9%                                     | 15.3%                                |
| Diabetes                                                         | 16.9%                                   | 14.6%                                    | 18.8%                                |
| Cancer                                                           | 12.7%                                   | 11.3%                                    | 10.8%                                |
| Renal failure                                                    | 1.9%                                    | 1.7%                                     | 3.7%                                 |
| Liver failure                                                    | 0.6%                                    | 0.6%                                     | 0.6%                                 |
| Dementia                                                         | 2.6%                                    | 2.2%                                     | 3.1%                                 |
| History of ischemic stroke                                       | 6.5%                                    | 3.9%                                     | 8.4%                                 |
| History of bleeding                                              | 3.5%                                    | 3.6%                                     | 4.0%                                 |
| HAS-BLED score, mean (sd)                                        | 2.2 (1.0)                               | 1.9 (1.1)                                | 2.4 (1.0)                            |
| CHA <sub>2</sub> DS <sub>2</sub> - VASc <sub>2</sub> , mean (sd) | 3.0 (1.6)                               | 2.6 (1.6)                                | 3.4 (1.5)                            |
| <b>Other treatments at cohort entry<sup>§</sup></b>              |                                         |                                          |                                      |
| Aspirin                                                          | 32.8%                                   | 25.9%                                    | 37.6%                                |
| Nonsteroidal anti-inflammatory drugs                             | 28.3%                                   | 29.8%                                    | 19.4%                                |
| Antiplatelet Agents (other than Aspirin)                         | 8.7%                                    | 6.4%                                     | 10.1%                                |
| Corticosteroids                                                  | 11.9%                                   | 13.1%                                    | 11.7%                                |
| <b>Prescriber of first anticoagulant</b>                         |                                         |                                          |                                      |
| General Practitioner                                             | 48.2%                                   | 56.9%                                    | 51.4%                                |
| Cardiologist                                                     | 24.1%                                   | 19.6%                                    | 29.2%                                |
| Other specialist                                                 | 20.9%                                   | 18.0%                                    | 12.0%                                |
| Unknown                                                          | 6.8%                                    | 5.5%                                     | 7.4%                                 |

\* *Direct oral anticoagulants*, † Standard deviation, ‡ defined in the 12 months prior to cohort entry, § defined in the 3 months prior to cohort entry

**Supplemental material – Sensitivity analysis – Cohort 2** - Cohort all patients newly treated with an anticoagulant therapy regardless of other potential concomitant therapies

**Table 3 – Multivariate analysis of the determinants associated with DOAC initiation according to year of therapy initiation.**

| Characteristics at treatment initiation             | 2011<br>N = 319*,372 |             | 2012<br>N = 353,242 |             | 2013<br>N = 327,150 |             | 2014<br>N = 311,352 |             | 2015<br>N =275,538 |             |
|-----------------------------------------------------|----------------------|-------------|---------------------|-------------|---------------------|-------------|---------------------|-------------|--------------------|-------------|
|                                                     | Adjusted OR          | CI 95%*     | Adjusted OR         | CI 95%      | Adjusted OR         | CI 95%      | Adjusted OR         | CI 95%      | Adjusted OR        | CI 95%      |
| <b>Demographic characteristics</b>                  |                      |             |                     |             |                     |             |                     |             |                    |             |
| Age                                                 |                      |             |                     |             |                     |             |                     |             |                    |             |
| < 65 years                                          | 0.57                 | 0.56 – 0.59 | 0.63                | 0.62 – 0.64 | 0.74                | 0.72 – 0.76 | 0.81                | 0.79 – 0.82 | 0.81               | 0.79 – 0.83 |
| 65 –74 years                                        | 1.0                  |             | 1.0                 |             | 1.0                 |             | 1.0                 |             | 1.0                |             |
| >= 75 years                                         | 0.56                 | 0.55 – 0.58 | 0.76                | 0.75 – 0.78 | 0.69                | 0.68 – 0.70 | 0.59                | 0.58 – 0.60 | 0.66               | 0.65 – 0.67 |
| Sex (Male)                                          | 0.86                 | 0.84 – 0.88 | 0.98                | 0.96 – 0.99 | 1.09                | 1.07 – 1.11 | 1.08                | 1.06 – 1.09 | 1.06               | 1.04 – 1.08 |
| <b>Clinical characteristics<sup>†</sup></b>         |                      |             |                     |             |                     |             |                     |             |                    |             |
| High blood pressure                                 | 0.76                 | 0.74 – 0.78 | 0.90                | 0.88 – 0.92 | 0.95                | 0.93 – 0.97 | 0.89                | 0.87 – 0.91 | 0.87               | 0.85 – 0.89 |
| Ischemic heart disease                              | 0.78                 | 0.76 – 0.81 | 0.81                | 0.79 – 0.83 | 0.76                | 0.75 – 0.78 | 0.74                | 0.72 – 0.76 | 0.77               | 0.75 – 0.80 |
| Heart failure                                       | 0.15                 | 0.14 – 0.16 | 0.56                | 0.54 – 0.57 | 0.63                | 0.62 – 0.64 | 0.58                | 0.56 – 0.59 | 0.64               | 0.63 – 0.66 |
| Diabetes                                            | 0.89                 | 0.86 – 0.92 | 0.90                | 0.88 – 0.92 | 0.89                | 0.87 – 0.91 | 0.89                | 0.87 – 0.91 | 0.91               | 0.89 – 0.93 |
| Cancer                                              | 0.71                 | 0.69 – 0.73 | 0.81                | 0.79 – 0.83 | 0.75                | 0.73 – 0.76 | 0.73                | 0.72 – 0.75 | 0.70               | 0.68 – 0.72 |
| Renal failure                                       | 0.29                 | 0.27 – 0.32 | 0.30                | 0.29 – 0.32 | 0.23                | 0.22 – 0.24 | 0.22                | 0.21 – 0.23 | 0.26               | 0.25 – 0.27 |
| Liver failure                                       | 0.50                 | 0.44 – 0.57 | 0.50                | 0.46 – 0.55 | 0.47                | 0.43 – 0.50 | 0.43                | 0.40 – 0.47 | 0.40               | 0.37 – 0.44 |
| Dementia                                            | 0.29                 | 0.26 – 0.31 | 0.56                | 0.54 – 0.59 | 0.61                | 0.59 – 0.63 | 0.60                | 0.58 – 0.63 | 0.63               | 0.60 – 0.66 |
| History of Ischemic Stroke                          | 0.24                 | 0.22 – 0.26 | 0.66                | 0.64 – 0.68 | 0.76                | 0.74 – 0.78 | 0.74                | 0.72 – 0.76 | 0.81               | 0.78 – 0.84 |
| History of bleeding                                 | 1.00                 | 0.95 – 1.05 | 0.70                | 0.68 – 0.73 | 0.54                | 0.52 – 0.56 | 0.53                | 0.51 – 0.55 | 0.54               | 0.52 – 0.56 |
| <b>Prescriber of first anticoagulant</b>            |                      |             |                     |             |                     |             |                     |             |                    |             |
| General Practitioner                                | 1.0                  |             | 1.0                 |             | 1.0                 |             | 1.0                 |             | 1.0                |             |
| Cardiologist                                        | 0.26                 | 0.25 – 0.28 | 1.91                | 1.87 – 1.95 | 2.86                | 2.80 – 2.92 | 2.78                | 2.72 – 2.84 | 2.67               | 2.60 – 2.73 |
| Other specialists/Unknown                           | 7.01                 | 6.85 – 7.18 | 3.76                | 3.69 – 3.84 | 1.83                | 1.79 – 1.87 | 1.79                | 1.75 – 1.82 | 1.55               | 1.51 – 1.58 |
| <b>Other treatments at cohort entry<sup>‡</sup></b> |                      |             |                     |             |                     |             |                     |             |                    |             |
| Aspirin                                             | 0.71                 | 0.69 – 0.73 | 1.00                | 0.98 – 1.02 | 0.98                | 0.96 – 1.00 | 0.91                | 0.90 – 0.93 | 0.87               | 0.85 – 0.88 |
| NSAID                                               | 2.77                 | 2.71 – 2.83 | 1.93                | 1.90 – 1.97 | 1.57                | 1.54 – 1.60 | 1.56                | 1.53 – 1.59 | 1.57               | 1.53 – 1.60 |
| Antiplatelet Agents                                 | 0.64                 | 0.61 – 0.68 | 0.94                | 0.91 – 0.97 | 0.83                | 0.81 – 0.85 | 0.75                | 0.72 – 0.77 | 0.76               | 0.73 – 0.78 |
| Corticosteroids                                     | 0.60                 | 0.58 – 0.62 | 0.70                | 0.68 – 0.72 | 0.79                | 0.77 – 0.80 | 0.84                | 0.82 – 0.86 | 0.87               | 0.85 – 0.89 |
| <b>Time of anticoagulant initiation</b>             |                      |             |                     |             |                     |             |                     |             |                    |             |
| 1 <sup>st</sup> term of the year                    | 1.0                  |             | 1.0                 |             | 1.0                 |             | 1.0                 |             | 1.0                |             |
| 2 <sup>nd</sup> term of the year                    | 1.02                 | 0.99 – 1.05 | 1.35                | 1.32 – 1.38 | 1.05                | 1.03 – 1.07 | 1.12                | 1.10 – 1.14 | 1.10               | 1.08 – 1.13 |
| 3 <sup>rd</sup> term of the year                    | 0.81                 | 0.78 – 0.83 | 2.22                | 2.17 – 2.28 | 0.96                | 0.94 – 0.98 | 1.09                | 1.07 – 1.12 | 1.12               | 1.10 – 1.15 |
| 4 <sup>th</sup> term of the year                    | 1.32                 | 1.29 – 1.37 | 5.92                | 5.79 – 6.05 | 0.69                | 0.68 – 0.70 | 1.38                | 1.35 – 1.41 | 1.31               | 1.28 – 1.34 |

\* 95% Confidence interval; † defined in the 12 months prior to cohort entry; ‡ defined in the 3 months prior to cohort entry
